# Supplementary material for: Extremely Low Organ Toxicity and Strong Antitumor Activity of miR-34-Regulated Oncolytic Coxsackievirus B3
Source: PubMed Central journal article supplement — Mol Ther Oncolytics. 2019 Jan 25;12:246–58. doi: 10.1016/j.omto.2019.01.003 (PMC6406029; doi:10.1016/j.omto.2019.01.003), 2019-01-25
Supplement: mmc1.pdf [file mmc1.pdf]

OMTO, Volume 12

## **Supplemental Information**

### **Extremely Low Organ Toxicity and Strong Antitumor Activity of miR-34-Regulated Oncolytic Coxsackievirus B3**

**Yang Jia, Shohei Miyamoto, Yasushi Soda, Yuto Takishima, Miyako Sagara, Jiyuan Liao, Lisa Hirose, Yasuki Hijikata, Yoshie Miura, Kenichiro Hara, Atsufumi Iwanaga, Yasunori Ota, and Kenzaburo Tani**

# Figure S1

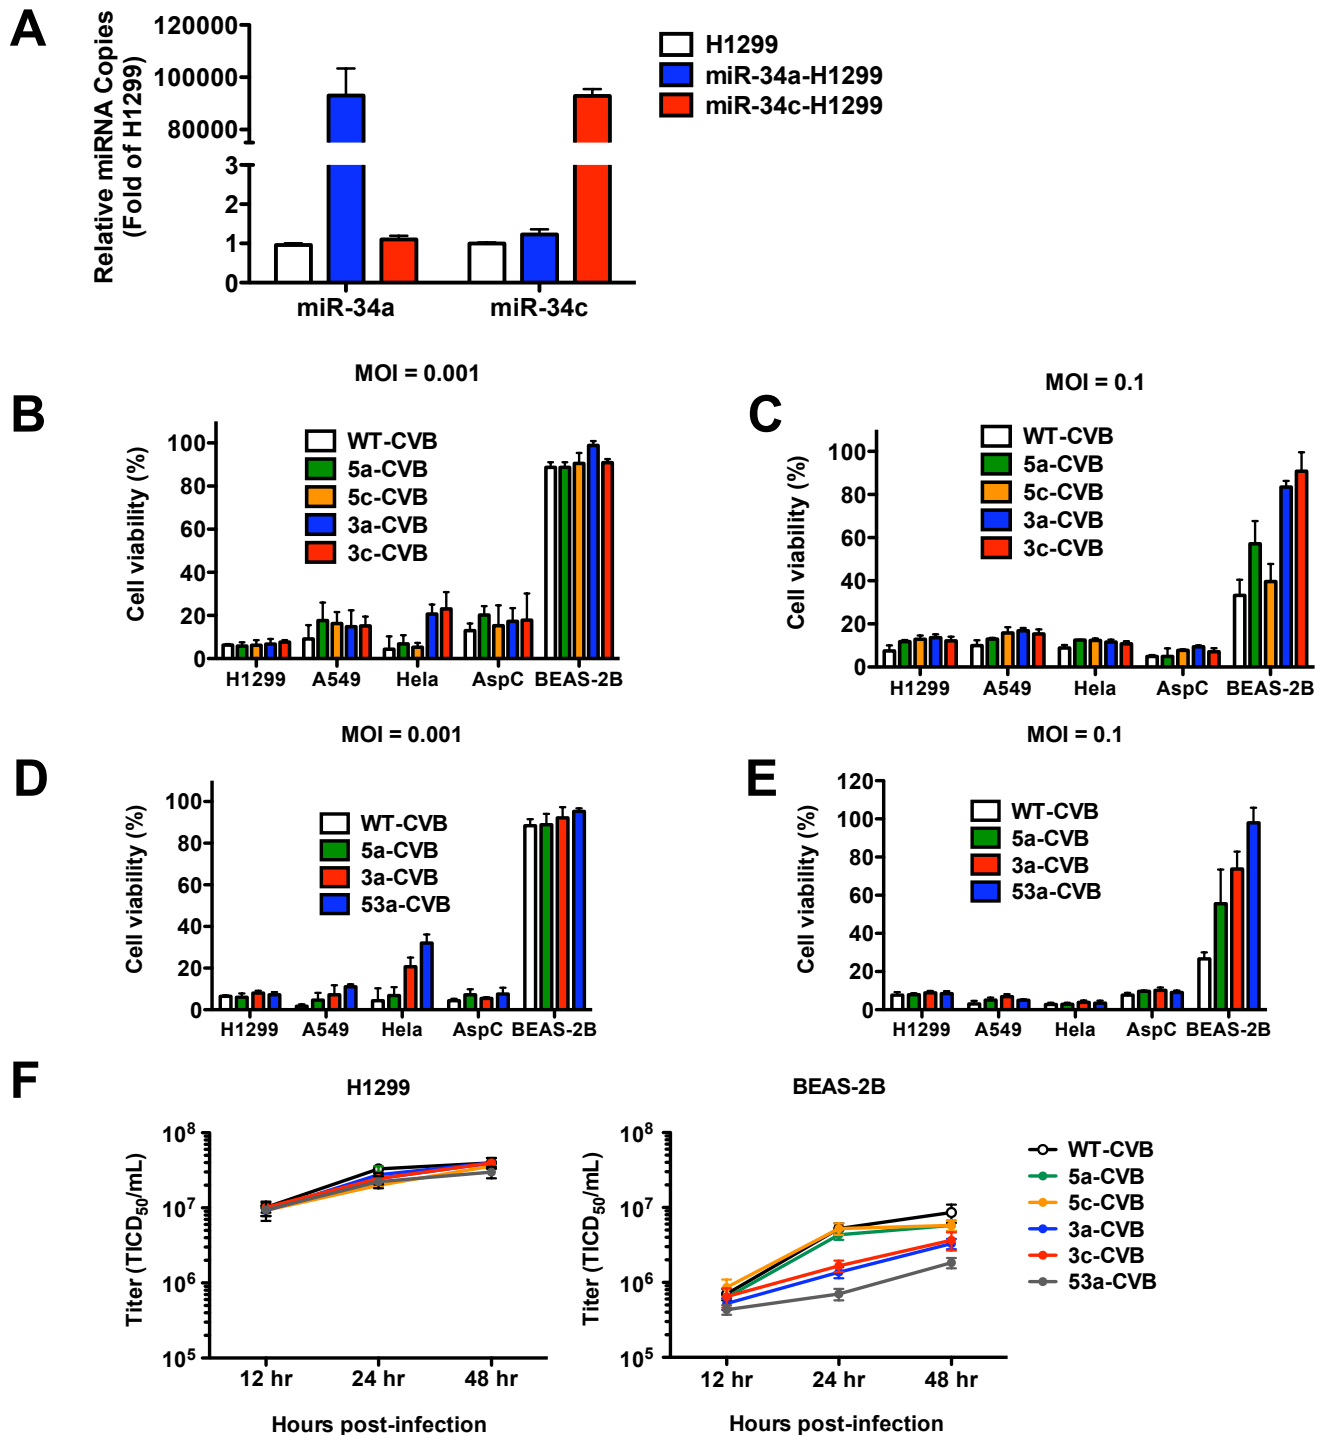

**Figure S1. Relative copy numbers of miR-34 mimics in transfected H1299 cells and cytotoxicity of miRT-CVBs in various cell lines.**

(A) H1299 cells were transfected with 10  $\mu$ M miR-34a (miR-34a-H1299) or miR-34c (miR-34c-H1299) mimics. At 24 hrs later, relative copy numbers of miR-34a and miR-34c were measured by RT-qPCR and normalized against U6 snRNA. Data represent means  $\pm$  SD of triplicate assays. (B-E) The cCell viability of various cell lines was determined by MTS assay 72 hrs after inoculation with 5-CVBs and 3-CVBs at a concentration of MOI = 0.001 (B) and MOI = 0.1 (C), and 53a-CVBs at MOI = 0.001 (D) and MOI = 0.1 (E). (F) Replication kinetics of miRT-CVBs were determined by single-step growth curve analysis (MOI = 3) in H1299 cells and BEAS-2B cells. Data are represented as mean virus titer  $\pm$  SD.

# Figure S2

## A

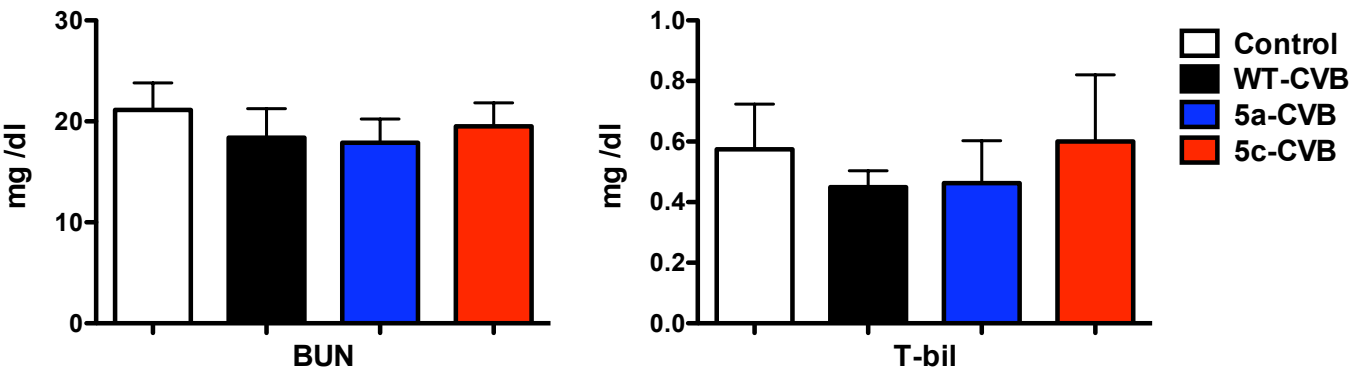

## B

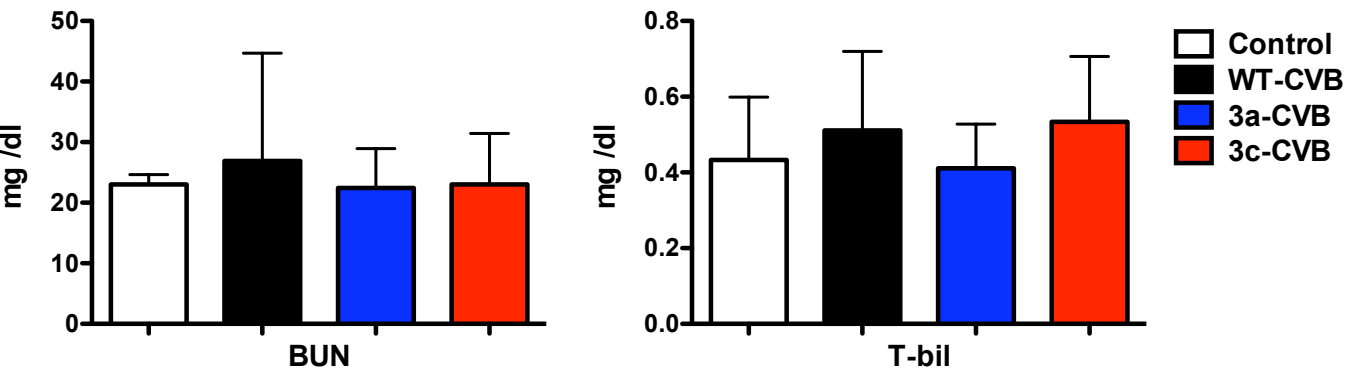

## C

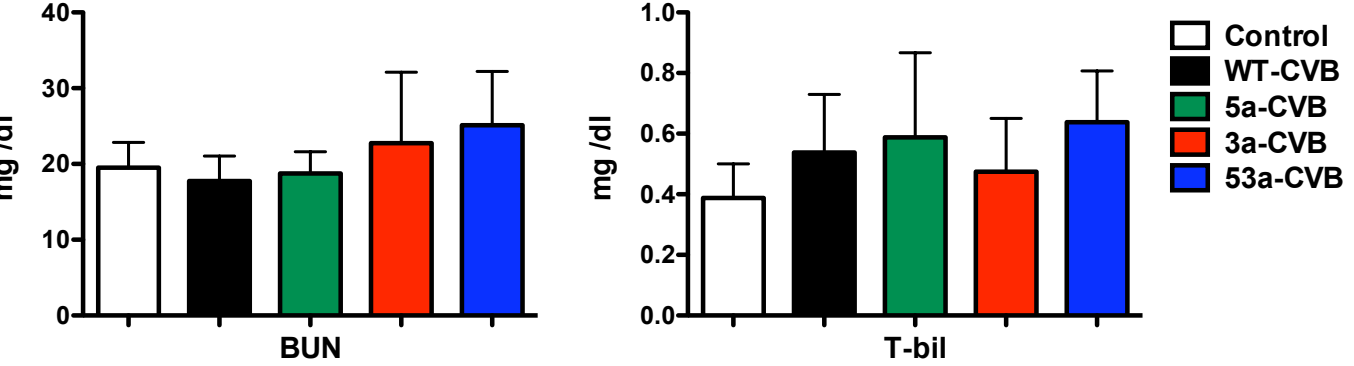

**Figure S2. Serum BUN and T-bil levels of mice treated with CVBs.**  
Serum BUN and T-bil levels of mice treated with 5-CVBs (A), 3-CVBs (B), or 53a-CVB (C). Data represent means  $\pm$  SD of eight or nine mice in each group.

# Figure S3

**A**

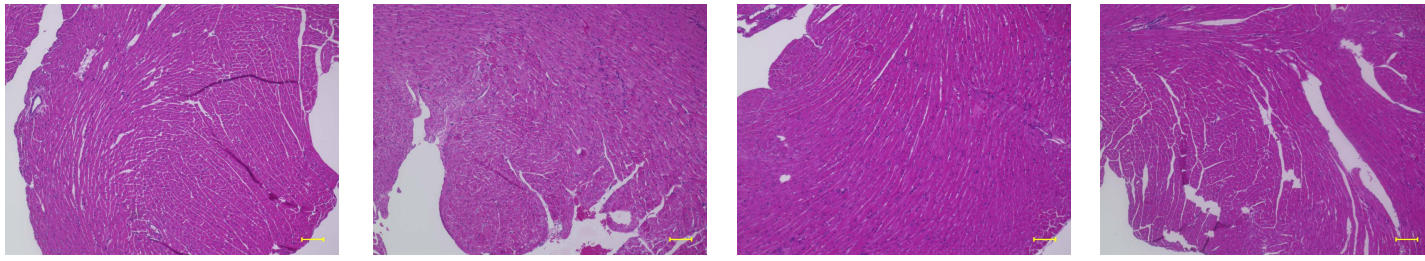

**Control**

**WT-CVB**

**5a-CVB**

**5c-CVB**

**B**

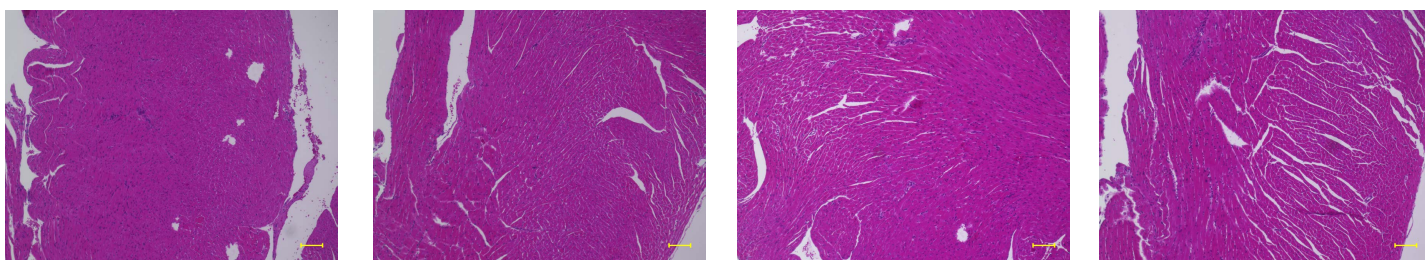

**Control**

**WT-CVB**

**3a-CVB**

**3c-CVB**

**C**

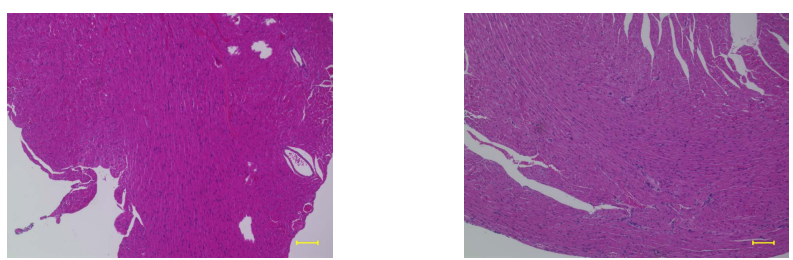

**Control**

**WT-CVB**

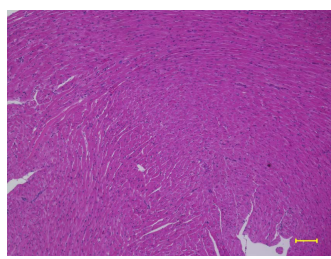

**5a-CVB**

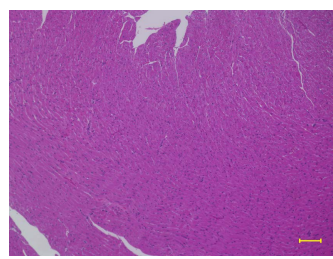

**3a-CVB**

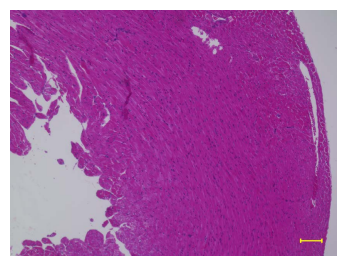

**53a-CVB**

**Figure S3. Histological examination of mouse hearts.**

H-E images of the hearts of mice treated with 5-CVBs (A), 3-CVBs (B), or 53a-CVB (C) 2 two days after inoculation with the indicated viruses. Scale bars, 100  $\mu$ m.

# Figure S4

**A**

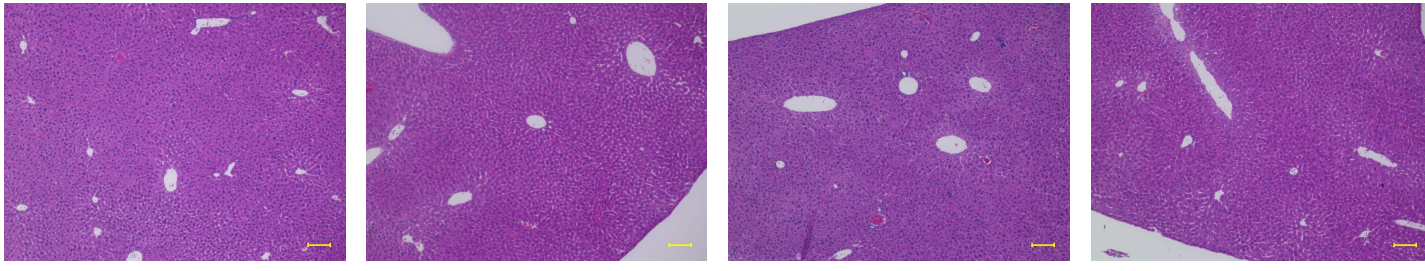

Control

WT-CVB

5a-CVB

5c-CVB

**B**

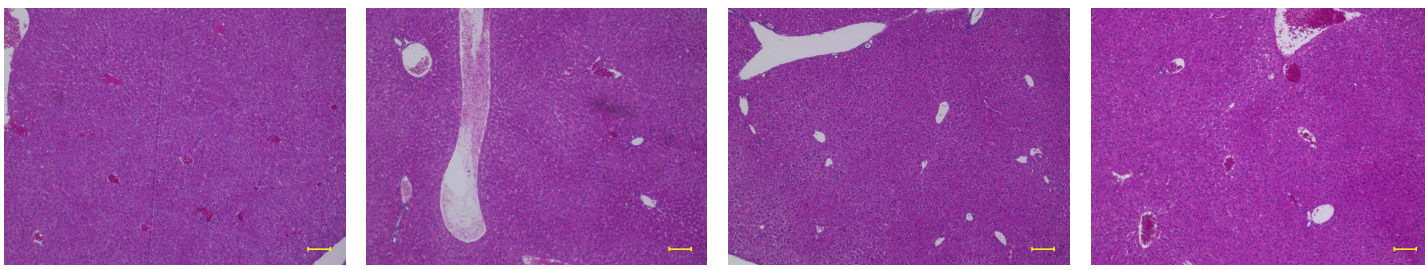

Control

WT-CVB

3a-CVB

3c-CVB

**C**

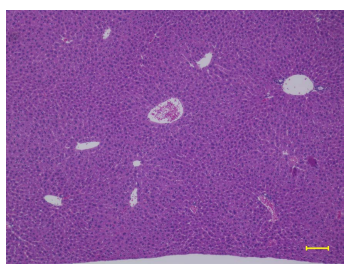

Control

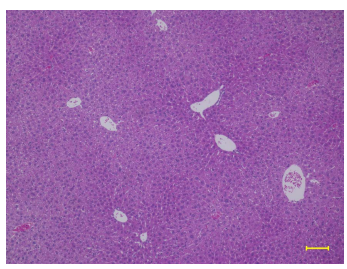

WT-CVB

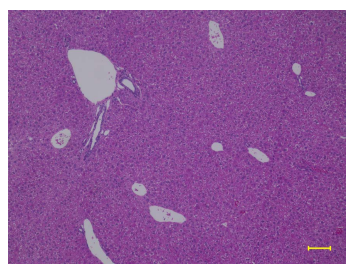

5a-CVB

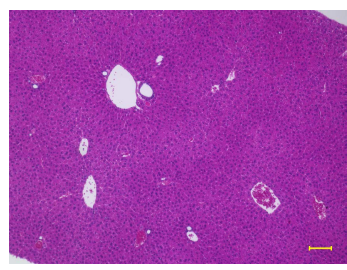

3a-CVB

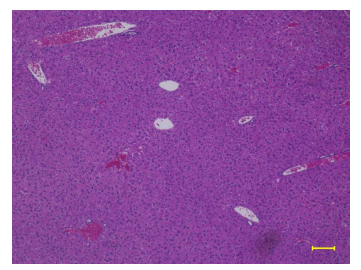

53a-CVB

**Figure S4. Histological examination of mouse livers.**

H-E images of the livers of mice treated with 5-CVBs (A), 3-CVBs (B), or 53a-CVB (C) 2 two days after inoculation with the indicated viruses. Scale bars, 100  $\mu$ m.

# Figure S5

## A

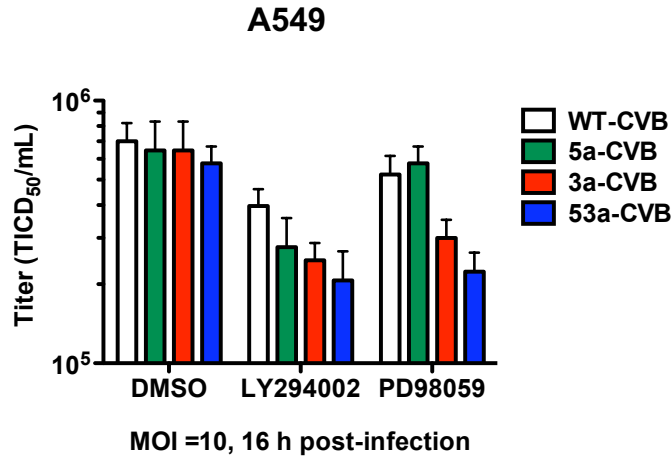

## B

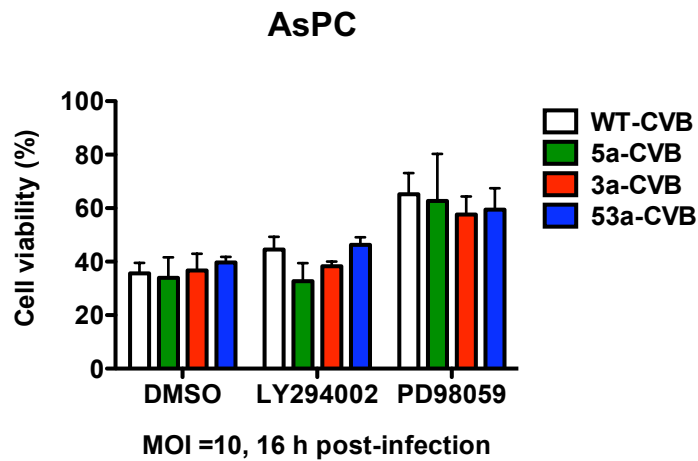

**Figure S5. Attenuated cytotoxicity of miR-34T-CVBs in miR-34a-high A549 cells with PI3K inhibitor LY294002 or MEK inhibitor PD98059.** A549 cells (A) and AsPC cells (B) were treated with 10  $\mu$ M LY294002, 10  $\mu$ M PD0335901, or DMSO for 1 hour, and then infected with viruses for 16 hrs. Supernatants from A549 cells were collected and a viral titer was determined (A). MTS assay was performed to determine the cell viability of AsPC cells (B). Data represent means  $\pm$  SD.

# Figure S6

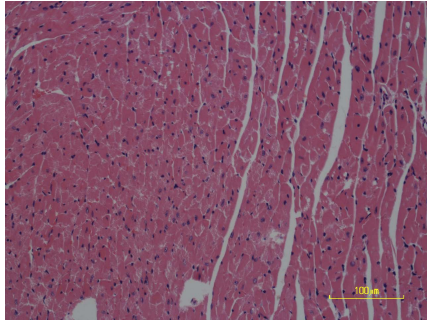

**Control**

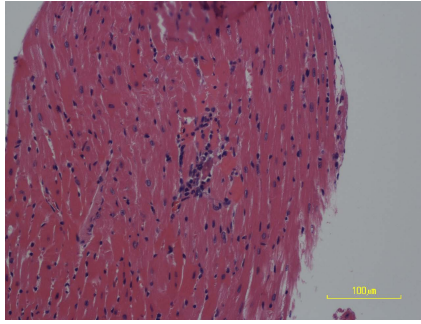

**WT-CVB**

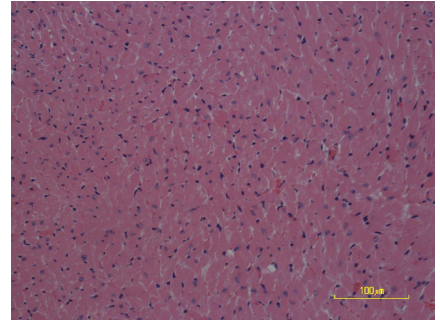

**53a-CVB**

**Figure S6. Histological examination of hearts in a myocarditis model.**  
Two days after three doses of virus were injected, mouse hearts were collected for histological examination. H-E images of the hearts of mice treated with vehicle control (A), WT-CVBs (B), or 53a-CVB (C). Magnification: 20x. Scale bar, 100  $\mu$ M.

# Figure S7

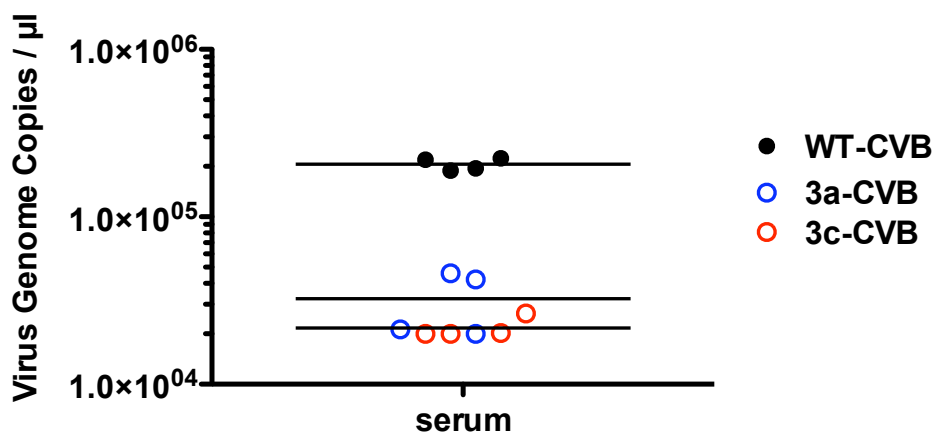

**Figure S7. Virus loads of 3-CVBs in mouse serum.**

Serum samples were collected two days after CVB injection in H1299 xenografts, and copy numbers of the CVB3 genome were quantified by RT-qPCR. Data represent means  $\pm$  SD of triplicated experiments.



# Figure S8

## A

8mer site

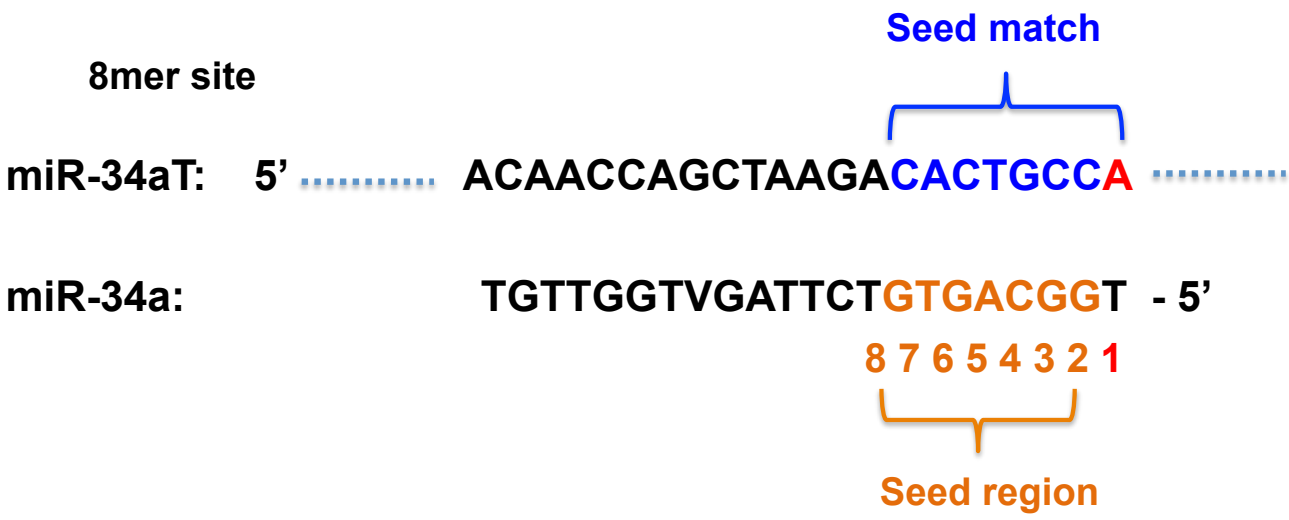

## B

7mer-m8 site

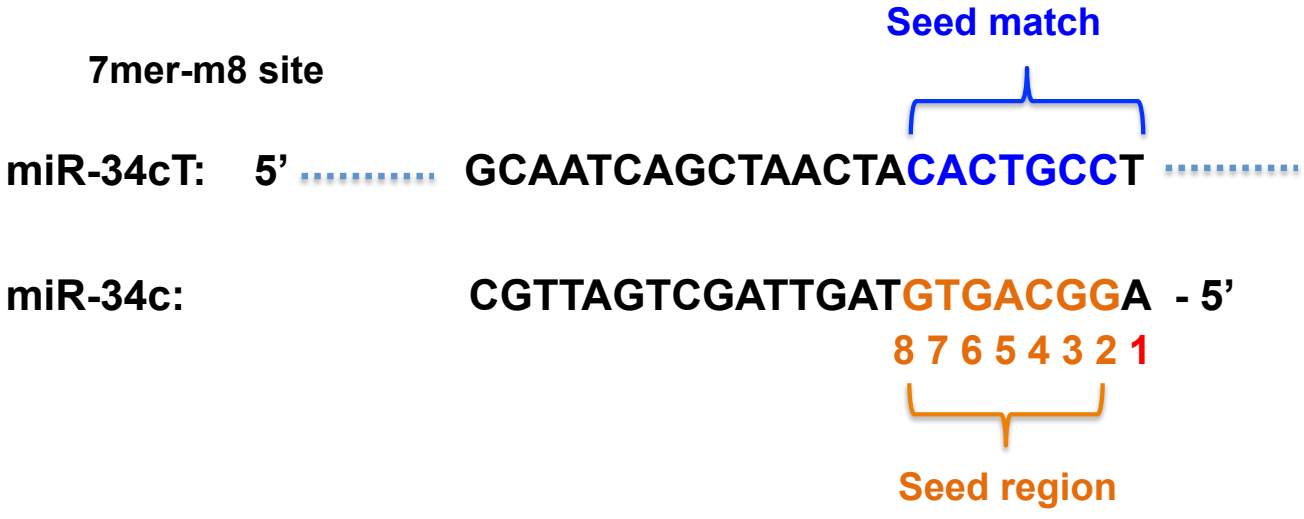

Figure S8. Nucleotide sequences of miR-34a, miR-34c, and their target sites. (A) miR-34a target site has seven contiguous Watson-Crick pairs complementary to the seed region (positions 2–8) of miR-34a, with an A at position 1. (B) miR-34c target site has a perfect match to the miRNA seed (positions 1-8).
